# Supplementary material for: Influence of Plant Origins and Seasonal Variations on Nutritive Values, Phenolics and Antioxidant Activities of Adenia viridiflora Craib., an Endangered Species from Thailand
Source: MDPI journal article supplement (doi:10.3390/foods10112799), 2021-11-14
Supplement: s1 [file s1]

# Supplementary materials

## Influence of Plant Origins and Seasonal Variations on Nutritive Values, Phenolics and Antioxidant Activities of *Adenia viridiflora* Craib., an Endangered Species from Thailand

Werawat Wannasaksri <sup>1</sup>, Piya Temviriyankul <sup>1</sup>, Amornrat Aursalung <sup>1</sup>, Yuraporn Sahasakul <sup>1</sup>, Sirinapa Thangsiri <sup>1</sup>, Woorawee Inthachai <sup>1</sup>, Nattira On-Nom <sup>1</sup>, Chaowanee Chupeerach <sup>1</sup>, Kanchana Pruesapan <sup>2</sup>, Somsri Charoenkiatkul <sup>1</sup> and Uthaiwan Suttisansanee <sup>1,\*</sup>

<sup>1</sup> Institute of Nutrition, Mahidol University, Salaya, Phuttamonthon, Nakhon Pathom 73170, Thailand; nit.frank@gmail.com (W.W.); piya.tem@mahidol.ac.th (P.T.); amornrat.aur@mahidol.ac.th (A.A.); yuraporn.sah@mahidol.ac.th (Y.S.); sirinapa.thang@outlook.com (S.T.); woorawee.int@mahidol.ac.th (W.I.); nattira.onn@mahidol.ac.th (N.O.); chaowanee.chu@mahidol.ac.th (C.C.); somsri.chr@mahidol.ac.th (S.C.); uthaiwan.sut@mahidol.ac.th (U.S.)

<sup>2</sup> Plant Varieties Protection Division, Department of Agriculture, Ministry of Agriculture and Cooperatives, Bangkok 10900, Thailand; kpruesapan@gmail.com (K.P.)

\* Correspondence: uthaiwan.sut@mahidol.ac.th; Tel.: +66-(0)-2800-2380 (ext. 422)

**Supplementary Table S1:**

Images of young shoots of Kamphaeng Phet (KP), Muang Nakhon Ratchasima (MN), Pakchong Nakhon Ratchasima (PN), and Uthai Thani (UT) originated *Adenia viridiflora* Craib. collected from different harvesting periods.

| Origins | Harvesting periods                                                                  |                                                                                      |                                                                                       |
|---------|-------------------------------------------------------------------------------------|--------------------------------------------------------------------------------------|---------------------------------------------------------------------------------------|
|         | March-April                                                                         | May-June                                                                             | July-August                                                                           |
| KP      |    |    |    |
| MN      |   |   |   |
| PN      |  |  |  |
| UT      |  |  |  |

**Note:** – scale of 10 cm.

**Supplementary Table S2:**

Images of old leaves of Kamphaeng Phet (KP), Muang, Nakhon Ratchasima (MN), Pakchong, Nakhon Ratchasima (PN), and Uthai Thani (UT) originated *Adenia viridiflora* Craib. collected from different harvesting periods.

| Origins | Harvesting periods                                                                  |                                                                                     |                                                                                     |                                                                                     |                                                                                       |                                                                                       |
|---------|-------------------------------------------------------------------------------------|-------------------------------------------------------------------------------------|-------------------------------------------------------------------------------------|-------------------------------------------------------------------------------------|---------------------------------------------------------------------------------------|---------------------------------------------------------------------------------------|
|         | March-April                                                                         |                                                                                     | May-June                                                                            |                                                                                     | July-August                                                                           |                                                                                       |
| KP      |    |    |    |    |    |    |
| MN      |    |    |    |    |    |    |
| PN      |   |   |   |   |   |   |
| UT      |  |  |  |  |  |  |

**Note:** – scale of 1 cm.

### Supplementary Table S3:

Color analysis of fresh and dried young shoots and old leaves of Kamphaeng Phet (KP), Muang, Nakhon Ratchasima (MN), Pakchong, Nakhon Ratchasima (PN), and Uthai Thani (UT) originated *Adenia viridiflora* Craib. collected from different harvesting periods.

| Samples                                                 | Color values of fresh samples |               |              | Color values of dried samples |              |              |
|---------------------------------------------------------|-------------------------------|---------------|--------------|-------------------------------|--------------|--------------|
|                                                         | L*                            | a*            | b*           | L*                            | a*           | b*           |
| <b>Young shoots from March-April harvesting periods</b> |                               |               |              |                               |              |              |
| KP                                                      | 34.50 ± 1.70                  | -6.49 ± 0.89  | 22.52 ± 1.07 | 36.86 ± 0.63                  | -4.97 ± 0.27 | 14.07 ± 0.84 |
| MN                                                      | 32.27 ± 4.61                  | -5.92 ± 0.89  | 21.51 ± 1.50 | 37.48 ± 0.26                  | -5.02 ± 0.02 | 14.79 ± 0.35 |
| PN                                                      | 41.89 ± 1.43                  | -8.87 ± 0.57  | 26.71 ± 1.91 | 39.05 ± 0.43                  | -5.52 ± 0.10 | 16.82 ± 0.23 |
| UT                                                      | 35.96 ± 4.69                  | -7.19 ± 2.95  | 24.60 ± 4.40 | 38.90 ± 0.17                  | -4.90 ± 0.13 | 15.07 ± 0.36 |
| <b>Young shoots from May-June harvesting periods</b>    |                               |               |              |                               |              |              |
| KP                                                      | 34.61 ± 5.08                  | -7.17 ± 1.55  | 21.64 ± 2.01 | 37.18 ± 1.46                  | -4.50 ± 0.43 | 13.79 ± 1.33 |
| MN                                                      | 40.57 ± 3.68                  | -8.84 ± 0.91  | 24.84 ± 1.34 | 37.18 ± 0.23                  | -3.55 ± 2.53 | 13.52 ± 0.19 |
| PN                                                      | 36.49 ± 2.02                  | -8.56 ± 0.36  | 25.50 ± 1.27 | 38.51 ± 1.80                  | -4.12 ± 0.55 | 13.47 ± 1.25 |
| UT                                                      | 36.67 ± 5.73                  | -8.27 ± 0.98  | 26.96 ± 3.04 | 39.27 ± 0.17                  | -4.62 ± 0.50 | 15.04 ± 1.47 |
| <b>Young shoots from July-August harvesting periods</b> |                               |               |              |                               |              |              |
| KP                                                      | 38.80 ± 6.44                  | -8.02 ± 2.52  | 25.87 ± 4.17 | 38.54 ± 2.93                  | -5.06 ± 0.54 | 15.69 ± 2.05 |
| MN                                                      | 37.67 ± 4.02                  | -7.57 ± 1.11  | 23.43 ± 2.68 | 38.90 ± 1.23                  | -5.08 ± 0.25 | 15.72 ± 0.57 |
| PN                                                      | 41.49 ± 3.11                  | -9.06 ± 0.20  | 28.51 ± 3.84 | 39.24 ± 1.07                  | -4.49 ± 0.34 | 14.43 ± 0.53 |
| UT                                                      | 33.19 ± 2.43                  | -7.11 ± 1.21  | 24.62 ± 2.49 | 42.39 ± 0.50                  | -5.23 ± 0.40 | 17.24 ± 1.10 |
| <b>Old leaves from March-April harvesting periods</b>   |                               |               |              |                               |              |              |
| KP                                                      | 42.92 ± 1.53                  | -9.66 ± 0.73  | 25.38 ± 1.11 | 35.37 ± 0.52                  | -5.14 ± 0.08 | 14.61 ± 0.41 |
| MN                                                      | 47.00 ± 2.39                  | -9.47 ± 0.02  | 26.94 ± 2.05 | 35.17 ± 0.98                  | -5.19 ± 0.21 | 14.85 ± 0.80 |
| PN                                                      | 46.12 ± 0.55                  | -10.02 ± 0.20 | 28.12 ± 1.47 | 35.48 ± 1.19                  | -4.81 ± 1.07 | 14.36 ± 1.75 |
| UT                                                      | 46.80 ± 3.80                  | -9.29 ± 0.51  | 29.65 ± 1.42 | 32.34 ± 0.11                  | -3.87 ± 0.06 | 11.95 ± 0.04 |
| <b>Old leaves from May-June harvesting periods</b>      |                               |               |              |                               |              |              |
| KP                                                      | 42.83 ± 4.14                  | -9.03 ± 0.12  | 24.96 ± 1.63 | 34.30 ± 1.91                  | -4.88 ± 0.66 | 13.80 ± 1.96 |
| MN                                                      | 39.95 ± 1.81                  | -8.49 ± 0.69  | 23.67 ± 0.23 | 43.59 ± 6.80                  | -5.60 ± 0.06 | 16.07 ± 0.95 |
| PN                                                      | 41.87 ± 2.99                  | -9.28 ± 0.40  | 25.43 ± 3.80 | 34.36 ± 0.97                  | -5.12 ± 0.38 | 13.69 ± 0.93 |
| UT                                                      | 40.63 ± 0.86                  | -10.13 ± 0.24 | 24.97 ± 1.93 | 35.83 ± 0.11                  | -5.28 ± 0.15 | 15.10 ± 0.27 |
| <b>Old leaves from July-August harvesting periods</b>   |                               |               |              |                               |              |              |
| KP                                                      | 44.47 ± 1.76                  | -9.83 ± 0.13  | 27.91 ± 0.63 | 33.89 ± 0.36                  | -3.76 ± 0.53 | 12.28 ± 0.87 |
| MN                                                      | 45.62 ± 2.38                  | -9.44 ± 0.30  | 28.25 ± 2.76 | 37.45 ± 0.38                  | -5.39 ± 0.26 | 15.99 ± 0.36 |
| PN                                                      | 44.56 ± 2.18                  | -9.42 ± 0.37  | 28.58 ± 2.21 | 35.92 ± 1.53                  | -4.69 ± 1.26 | 14.35 ± 2.11 |
| UT                                                      | 44.47 ± 6.98                  | -9.75 ± 1.06  | 31.94 ± 5.90 | 37.29 ± 0.84                  | -5.11 ± 0.25 | 15.69 ± 0.19 |

All data were expressed as mean ± standard deviation (SD) of triplicate experiments ( $n = 3$ ). L\* describes darkness (-) to lightness (+), a\* describes green (-) to red (+) colors, and b\* describes indigo (-) to yellow (+).

### Supplementary Table S4:

The moisture contents of fresh and dried young shoots and old leaves of Kamphaeng Phet (KP), Muang, Nakhon Ratchasima (MN), Pakchong, Nakhon Ratchasima (PN), and Uthai Thani (UT) originated *Adenia viridiflora* Craib from different harvesting periods.

| Varieties                 | Moisture content (%) |              |              |
|---------------------------|----------------------|--------------|--------------|
|                           | March-April          | May-June     | July-August  |
| <b>Fresh young shoots</b> |                      |              |              |
| KP                        | 85.78 ± 0.40         | 83.95 ± 0.51 | 84.65 ± 0.52 |
| MN                        | 83.99 ± 0.37         | 83.69 ± 0.20 | 84.26 ± 0.46 |
| PN                        | 85.47 ± 0.30         | 84.37 ± 0.32 | 85.48 ± 0.32 |
| UT                        | 86.87 ± 0.77         | 84.69 ± 0.25 | 85.61 ± 0.41 |
| <b>Fresh old leaves</b>   |                      |              |              |
| KP                        | 80.17 ± 0.17         | 78.00 ± 0.67 | 81.07 ± 0.23 |
| MN                        | 80.43 ± 0.67         | 78.01 ± 0.26 | 80.04 ± 0.67 |
| PN                        | 82.11 ± 0.51         | 79.60 ± 0.08 | 81.22 ± 0.06 |
| UT                        | 80.91 ± 0.57         | 81.62 ± 0.53 | 83.08 ± 0.17 |
| <b>Dried young shoots</b> |                      |              |              |
| KP                        | 6.79 ± 0.83          | 6.03 ± 1.20  | 6.15 ± 0.79  |
| MN                        | 5.39 ± 0.95          | 5.18 ± 0.72  | 6.61 ± 1.05  |
| PN                        | 7.79 ± 0.31          | 6.29 ± 1.02  | 5.32 ± 0.63  |
| UT                        | 6.73 ± 2.30          | 6.41 ± 0.98  | 7.21 ± 0.67  |
| <b>Dried old leaves</b>   |                      |              |              |
| KP                        | 6.19 ± 0.54          | 5.54 ± 0.39  | 5.52 ± 0.46  |
| MN                        | 6.77 ± 0.23          | 6.92 ± 0.27  | 6.26 ± 0.19  |
| PN                        | 6.71 ± 0.26          | 5.64 ± 0.30  | 6.09 ± 1.19  |
| UT                        | 7.81 ± 1.40          | 6.71 ± 1.29  | 7.38 ± 0.38  |

All data were expressed as mean ± standard deviation (SD) of triplicate experiments ( $n = 3$ ).

## Supplementary Table S5:

Nutritional compositions (per 100 g fresh weight) in young shoots and old leaves of *Adenia viridiflora* Craib. collected from Kamphaeng Phet (KP) origin in different harvesting periods.

| Nutrients               | Young shoots                 |                              |                             | Old leaves                  |                             |                             |
|-------------------------|------------------------------|------------------------------|-----------------------------|-----------------------------|-----------------------------|-----------------------------|
|                         | March-April                  | May-June                     | July-August                 | March-April                 | May-June                    | July-August                 |
| <b>Energy (kcal)</b>    | 56.85 ± 3.10 <sup>A*</sup>   | 61.86 ± 3.01 <sup>A*</sup>   | 55.98 ± 3.51 <sup>A*</sup>  | 79.70 ± 0.51 <sup>a</sup>   | 79.29 ± 0.74 <sup>a</sup>   | 68.61 ± 1.49 <sup>b</sup>   |
| <b>Moisture (g)</b>     | 85.11 ± 0.57 <sup>A*</sup>   | 84.05 ± 0.77 <sup>A*</sup>   | 85.31 ± 0.91 <sup>A*</sup>  | 79.07 ± 0.04 <sup>b</sup>   | 79.12 ± 0.23 <sup>b</sup>   | 81.96 ± 0.12 <sup>a</sup>   |
| <b>Protein (g)</b>      | 3.10 ± 0.04 <sup>A*</sup>    | 3.09 ± 0.16 <sup>AB*</sup>   | 2.75 ± 0.07 <sup>B*</sup>   | 4.44 ± 0.03 <sup>a</sup>    | 3.59 ± 0.06 <sup>b</sup>    | 3.52 ± 0.05 <sup>b</sup>    |
| <b>Fat (g)</b>          | 0.37 ± 0.16 <sup>A</sup>     | 0.66 ± 0.06 <sup>A</sup>     | 0.46 ± 0.00 <sup>A</sup>    | 0.48 ± 0.14 <sup>a</sup>    | 0.69 ± 0.05 <sup>a</sup>    | 0.53 ± 0.19 <sup>a</sup>    |
| <b>Carbohydrate (g)</b> | 10.29 ± 0.37 <sup>A*</sup>   | 10.91 ± 0.45 <sup>A*</sup>   | 10.21 ± 0.81 <sup>A*</sup>  | 14.41 ± 0.22 <sup>a</sup>   | 14.69 ± 0.24 <sup>a</sup>   | 12.46 ± 0.01 <sup>b</sup>   |
| <b>TDF (g)</b>          | 5.39 ± 0.40 <sup>B</sup>     | 5.83 ± 0.06 <sup>B*</sup>    | 8.53 ± 0.10 <sup>A*</sup>   | 6.10 ± 0.10 <sup>b</sup>    | 8.96 ± 0.02 <sup>a</sup>    | 9.29 ± 0.19 <sup>a</sup>    |
| - SDF (g)               | 0.89 ± 0.29 <sup>B</sup>     | 1.89 ± 0.13 <sup>A</sup>     | 1.52 ± 0.08 <sup>A*</sup>   | 0.91 ± 0.04 <sup>b</sup>    | 2.22 ± 0.17 <sup>a</sup>    | 2.32 ± 0.35 <sup>a</sup>    |
| - IDF (g)               | 4.51 ± 0.11 <sup>B*</sup>    | 3.94 ± 0.06 <sup>C*</sup>    | 7.01 ± 0.18 <sup>A</sup>    | 5.20 ± 0.06 <sup>b</sup>    | 6.74 ± 0.15 <sup>a</sup>    | 6.97 ± 0.16 <sup>a</sup>    |
| <b>Total sugar (g)</b>  | 1.71 ± 0.01 <sup>C*</sup>    | 1.93 ± 0.01 <sup>B*</sup>    | 2.20 ± 0.04 <sup>A*</sup>   | 3.17 ± 0.03 <sup>a</sup>    | 2.81 ± 0.18 <sup>b</sup>    | 3.26 ± 0.01 <sup>a</sup>    |
| - Fructose(g)           | 0.30 ± 0.01 <sup>C*</sup>    | 0.65 ± 0.02 <sup>A*</sup>    | 0.50 ± 0.01 <sup>B*</sup>   | 1.08 ± 0.08 <sup>a</sup>    | 1.02 ± 0.01 <sup>a</sup>    | 1.12 ± 0.03 <sup>a</sup>    |
| - Glucose(g)            | 1.41 ± 0.03 <sup>A*</sup>    | 1.29 ± 0.01 <sup>B*</sup>    | 1.43 ± 0.04 <sup>A*</sup>   | 1.98 ± 0.05 <sup>a</sup>    | 1.56 ± 0.13 <sup>b</sup>    | 1.79 ± 0.02 <sup>ab</sup>   |
| - Sucrose(g)            | ND                           | ND                           | 0.28 ± 0.00 <sup>*</sup>    | 0.12 ± 0.01 <sup>c</sup>    | 0.23 ± 0.04 <sup>b</sup>    | 0.35 ± 0.00 <sup>a</sup>    |
| <b>Ash (g)</b>          | 1.14 ± 0.00 <sup>A*</sup>    | 1.31 ± 0.10 <sup>A*</sup>    | 1.27 ± 0.03 <sup>A*</sup>   | 1.61 ± 0.01 <sup>b</sup>    | 1.92 ± 0.02 <sup>a</sup>    | 1.55 ± 0.01 <sup>c</sup>    |
| <b>Vitamin C (mg)</b>   | 112.47 ± 10.36 <sup>B*</sup> | 165.25 ± 13.90 <sup>A*</sup> | 189.22 ± 9.05 <sup>A*</sup> | 221.51 ± 10.71 <sup>c</sup> | 281.77 ± 2.95 <sup>b</sup>  | 332.40 ± 9.52 <sup>a</sup>  |
| <b>Minerals (mg)</b>    |                              |                              |                             |                             |                             |                             |
| - Calcium               | 97.29 ± 2.37 <sup>C*</sup>   | 146.86 ± 6.11 <sup>A*</sup>  | 125.31 ± 1.63 <sup>B*</sup> | 238.04 ± 1.73 <sup>b</sup>  | 343.40 ± 15.11 <sup>a</sup> | 230.58 ± 2.90 <sup>b</sup>  |
| - Phosphorus            | 79.26 ± 12.05 <sup>A</sup>   | 95.54 ± 13.91 <sup>A</sup>   | 82.21 ± 2.48 <sup>A</sup>   | 94.37 ± 3.01 <sup>a</sup>   | 99.72 ± 3.14 <sup>a</sup>   | 78.19 ± 0.19 <sup>b</sup>   |
| - Sodium                | 20.38 ± 11.41 <sup>A</sup>   | 21.01 ± 5.00 <sup>A</sup>    | 14.77 ± 10.62 <sup>A</sup>  | 13.06 ± 3.60 <sup>ab</sup>  | 17.96 ± 0.54 <sup>a</sup>   | 10.78 ± 0.02 <sup>b</sup>   |
| - Potassium             | 309.06 ± 7.82 <sup>A</sup>   | 311.26 ± 20.95 <sup>A</sup>  | 345.70 ± 4.89 <sup>A</sup>  | 323.07 ± 2.89 <sup>a</sup>  | 322.31 ± 6.12 <sup>a</sup>  | 361.18 ± 20.55 <sup>a</sup> |
| - Magnesium             | 45.72 ± 2.69 <sup>B*</sup>   | 34.72 ± 2.12 <sup>B*</sup>   | 69.77 ± 10.84 <sup>A*</sup> | 96.94 ± 1.68 <sup>b</sup>   | 71.36 ± 3.54 <sup>c</sup>   | 137.65 ± 3.08 <sup>a</sup>  |
| - Iron                  | 0.72 ± 0.03 <sup>A*</sup>    | 0.69 ± 0.11 <sup>A*</sup>    | 0.89 ± 0.04 <sup>A*</sup>   | 1.31 ± 0.01 <sup>a</sup>    | 1.36 ± 0.05 <sup>a</sup>    | 1.36 ± 0.22 <sup>a</sup>    |
| - Zinc                  | 0.57 ± 0.04 <sup>A</sup>     | 0.60 ± 0.04 <sup>A*</sup>    | 0.57 ± 0.00 <sup>A*</sup>   | 0.63 ± 0.04 <sup>b</sup>    | 0.82 ± 0.04 <sup>a</sup>    | 0.63 ± 0.01 <sup>b</sup>    |

All data were expressed as mean ± standard deviation (SD) of triplicate experiments ( $n = 3$ ). ND: not detected; TDF: total dietary fiber; SDF: soluble dietary fiber; IDF: insoluble dietary fiber; capital and small letters indicate significant differences ( $p < 0.05$ ) of the same nutrients in young shoots and old leaves, respectively, from different harvesting periods using one-way analysis of variance (ANOVA) and Duncan's multiple comparison test; \* indicates significant differences ( $p < 0.05$ ) of the same nutrient between young shoot and old leaves from the same harvesting period using unpaired t-test.

## Supplementary Table S6:

Nutritional compositions (per 100 g fresh weight) in young shoots and old leaves of *Adenia viridiflora* Craib. collected from Muang Nakhon Ratchasima (MN) origin in different harvesting periods.

| Nutrients               | Young shoots                |                             |                             | Old leaves                  |                             |                            |
|-------------------------|-----------------------------|-----------------------------|-----------------------------|-----------------------------|-----------------------------|----------------------------|
|                         | March-April                 | May-June                    | July-August                 | March-April                 | May-June                    | July-August                |
| <b>Energy (kcal)</b>    | 71.44 ± 3.28 <sup>A*</sup>  | 61.81 ± 1.90 <sup>B*</sup>  | 63.54 ± 1.22 <sup>B</sup>   | 82.11 ± 1.85 <sup>a</sup>   | 75.67 ± 0.37 <sup>ab</sup>  | 69.71 ± 3.85 <sup>b</sup>  |
| <b>Moisture (g)</b>     | 81.33 ± 0.76 <sup>B*</sup>  | 83.61 ± 0.45 <sup>A*</sup>  | 83.37 ± 0.23 <sup>A</sup>   | 78.00 ± 0.55 <sup>b</sup>   | 79.88 ± 0.23 <sup>ab</sup>  | 81.50 ± 1.15 <sup>a</sup>  |
| <b>Protein (g)</b>      | 3.88 ± 0.35 <sup>A</sup>    | 3.29 ± 0.02 <sup>AB*</sup>  | 3.07 ± 0.01 <sup>B*</sup>   | 4.37 ± 0.02 <sup>a</sup>    | 3.66 ± 0.01 <sup>b</sup>    | 3.33 ± 0.04 <sup>c</sup>   |
| <b>Fat (g)</b>          | 0.44 ± 0.06 <sup>A</sup>    | 0.33 ± 0.03 <sup>A</sup>    | 0.44 ± 0.06 <sup>A</sup>    | 0.37 ± 0.05 <sup>a</sup>    | 0.47 ± 0.08 <sup>a</sup>    | 0.41 ± 0.14 <sup>a</sup>   |
| <b>Carbohydrate (g)</b> | 13.00 ± 0.35 <sup>A*</sup>  | 11.43 ± 0.39 <sup>B*</sup>  | 11.84 ± 0.17 <sup>B</sup>   | 15.34 ± 0.55 <sup>a</sup>   | 14.21 ± 0.28 <sup>a</sup>   | 13.18 ± 1.24 <sup>a</sup>  |
| <b>TDF (g)</b>          | 6.14 ± 0.14 <sup>B*</sup>   | 8.19 ± 0.08 <sup>A*</sup>   | 8.08 ± 0.47 <sup>A</sup>    | 7.57 ± 0.16 <sup>b</sup>    | 8.98 ± 0.23 <sup>a</sup>    | 8.87 ± 0.45 <sup>a</sup>   |
| - SDF (g)               | 0.64 ± 0.03 <sup>B*</sup>   | 1.56 ± 0.01 <sup>A*</sup>   | 1.47 ± 0.34 <sup>A*</sup>   | 1.38 ± 0.01 <sup>b</sup>    | 2.52 ± 0.18 <sup>a</sup>    | 2.69 ± 0.28 <sup>a</sup>   |
| - IDF (g)               | 5.50 ± 0.11 <sup>B*</sup>   | 6.63 ± 0.07 <sup>A</sup>    | 6.61 ± 0.13 <sup>A*</sup>   | 6.19 ± 0.16 <sup>a</sup>    | 6.46 ± 0.06 <sup>a</sup>    | 6.19 ± 0.18 <sup>a</sup>   |
| <b>Total sugar (g)</b>  | 1.68 ± 0.01 <sup>B*</sup>   | 1.39 ± 0.05 <sup>C*</sup>   | 2.67 ± 0.04 <sup>A*</sup>   | 3.07 ± 0.01 <sup>b</sup>    | 2.95 ± 0.04 <sup>c</sup>    | 3.36 ± 0.03 <sup>a</sup>   |
| - Fructose(g)           | 0.39 ± 0.03 <sup>C*</sup>   | 0.66 ± 0.01 <sup>B*</sup>   | 0.75 ± 0.02 <sup>A*</sup>   | 0.95 ± 0.03 <sup>c</sup>    | 1.11 ± 0.02 <sup>b</sup>    | 1.19 ± 0.01 <sup>a</sup>   |
| - Glucose(g)            | 1.29 ± 0.04 <sup>B*</sup>   | 0.73 ± 0.06 <sup>C*</sup>   | 1.65 ± 0.01 <sup>A*</sup>   | 1.69 ± 0.02 <sup>b</sup>    | 1.67 ± 0.01 <sup>b</sup>    | 1.88 ± 0.01 <sup>a</sup>   |
| - Sucrose(g)            | <LOD                        | ND                          | 0.27 ± 0.00 <sup>*</sup>    | 0.44 ± 0.01 <sup>a</sup>    | 0.18 ± 0.01 <sup>c</sup>    | 0.30 ± 0.01 <sup>b</sup>   |
| <b>Ash (g)</b>          | 1.37 ± 0.01 <sup>A*</sup>   | 1.36 ± 0.01 <sup>A*</sup>   | 1.30 ± 0.01 <sup>B*</sup>   | 1.93 ± 0.03 <sup>a</sup>    | 1.79 ± 0.04 <sup>b</sup>    | 1.59 ± 0.01 <sup>c</sup>   |
| <b>Vitamin C (mg)</b>   | 144.81 ± 7.74 <sup>C*</sup> | 167.06 ± 5.04 <sup>B*</sup> | 218.18 ± 3.76 <sup>A*</sup> | 189.78 ± 4.36 <sup>c</sup>  | 222.37 ± 0.93 <sup>b</sup>  | 295.33 ± 4.50 <sup>a</sup> |
| <b>Minerals (mg)</b>    |                             |                             |                             |                             |                             |                            |
| - Calcium               | 125.09 ± 4.69 <sup>B*</sup> | 146.77 ± 5.38 <sup>A*</sup> | 150.87 ± 2.48 <sup>A*</sup> | 354.29 ± 1.70 <sup>a</sup>  | 330.62 ± 33.78 <sup>a</sup> | 265.57 ± 5.14 <sup>b</sup> |
| - Phosphorus            | 89.00 ± 1.50 <sup>A</sup>   | 84.06 ± 0.74 <sup>A</sup>   | 77.84 ± 9.19 <sup>A</sup>   | 91.95 ± 1.34 <sup>a</sup>   | 80.85 ± 2.39 <sup>a</sup>   | 79.39 ± 9.93 <sup>a</sup>  |
| - Sodium                | 10.28 ± 0.42 <sup>A</sup>   | 14.00 ± 10.09 <sup>A</sup>  | 8.60 ± 1.68 <sup>A</sup>    | 16.62 ± 12.00 <sup>a</sup>  | 12.37 ± 4.66 <sup>a</sup>   | 9.05 ± 1.91 <sup>a</sup>   |
| - Potassium             | 337.79 ± 5.69 <sup>A</sup>  | 358.22 ± 6.80 <sup>A</sup>  | 362.23 ± 14.30 <sup>A</sup> | 298.26 ± 17.73 <sup>a</sup> | 378.04 ± 50.61 <sup>a</sup> | 366.64 ± 9.34 <sup>a</sup> |
| - Magnesium             | 66.67 ± 1.74 <sup>A*</sup>  | 48.79 ± 3.92 <sup>B*</sup>  | 74.97 ± 3.53 <sup>A*</sup>  | 118.69 ± 0.90 <sup>b</sup>  | 69.19 ± 4.14 <sup>c</sup>   | 175.88 ± 2.72 <sup>a</sup> |
| - Iron                  | 0.87 ± 0.03 <sup>A*</sup>   | 0.85 ± 0.01 <sup>A*</sup>   | 0.82 ± 0.06 <sup>A*</sup>   | 1.88 ± 0.34 <sup>a</sup>    | 1.43 ± 0.05 <sup>ab</sup>   | 1.19 ± 0.09 <sup>b</sup>   |
| - Zinc                  | 0.42 ± 0.01 <sup>B*</sup>   | 0.43 ± 0.03 <sup>B*</sup>   | 0.53 ± 0.01 <sup>A*</sup>   | 0.57 ± 0.07 <sup>a</sup>    | 0.52 ± 0.04 <sup>a</sup>    | 0.66 ± 0.02 <sup>a</sup>   |

All data were expressed as mean ± standard deviation (SD) of triplicate experiments ( $n = 3$ ). ND: not detected; TDF: total dietary fiber; SDF: soluble dietary fiber; IDF: insoluble dietary fiber; capital and small letters indicate significant differences ( $p < 0.05$ ) of the same nutrients in young shoots and old leaves, respectively, from different harvesting periods using one-way analysis of variance (ANOVA) and Duncan's multiple comparison test; \* indicates significant differences ( $p < 0.05$ ) of the same nutrient between young shoot and old leaves from the same harvesting period using unpaired t-test.

## Supplementary Table S7:

Nutritional compositions (per 100 g fresh weight) in young shoots and old leaves of *Adenia viridiflora* Craib. collected from Pakchong Nakhon Ratchasima (PN) origin in different harvesting periods.

| Nutrients               | Young shoots                |                              |                              | Old leaves                 |                            |                              |
|-------------------------|-----------------------------|------------------------------|------------------------------|----------------------------|----------------------------|------------------------------|
|                         | March-April                 | May-June                     | July-August                  | March-April                | May-June                   | July-August                  |
| <b>Energy (kcal)</b>    | 61.28 ± 1.54 <sup>A*</sup>  | 59.19 ± 2.06 <sup>AB*</sup>  | 55.03 ± 0.80 <sup>B*</sup>   | 73.97 ± 0.17 <sup>a</sup>  | 74.34 ± 0.51 <sup>a</sup>  | 73.17 ± 2.19 <sup>a</sup>    |
| <b>Moisture (g)</b>     | 83.72 ± 0.42 <sup>B*</sup>  | 84.49 ± 0.59 <sup>AB*</sup>  | 85.77 ± 0.23 <sup>A*</sup>   | 80.89 ± 0.01 <sup>a</sup>  | 80.25 ± 0.05 <sup>a</sup>  | 80.90 ± 0.37 <sup>a</sup>    |
| <b>Protein (g)</b>      | 2.96 ± 0.04 <sup>B*</sup>   | 3.41 ± 0.18 <sup>A</sup>     | 2.97 ± 0.00 <sup>B*</sup>    | 4.34 ± 0.08 <sup>a</sup>   | 3.89 ± 0.06 <sup>b</sup>   | 3.40 ± 0.00 <sup>c</sup>     |
| <b>Fat (g)</b>          | 0.10 ± 0.01 <sup>B*</sup>   | 0.43 ± 0.03 <sup>A</sup>     | 0.47 ± 0.01 <sup>A</sup>     | 0.59 ± 0.03 <sup>a</sup>   | 0.42 ± 0.06 <sup>a</sup>   | 0.51 ± 0.13 <sup>a</sup>     |
| <b>Carbohydrate (g)</b> | 12.14 ± 0.38 <sup>A</sup>   | 10.43 ± 0.28 <sup>B*</sup>   | 9.74 ± 0.18 <sup>B*</sup>    | 12.83 ± 0.10 <sup>b</sup>  | 13.76 ± 0.06 <sup>a</sup>  | 13.75 ± 0.26 <sup>a</sup>    |
| <b>TDF (g)</b>          | 7.16 ± 0.13 <sup>B</sup>    | 6.36 ± 0.09 <sup>B*</sup>    | 7.22 ± 0.41 <sup>A*</sup>    | 7.52 ± 0.35 <sup>b</sup>   | 8.48 ± 0.11 <sup>a</sup>   | 8.87 ± 0.15 <sup>a</sup>     |
| - SDF (g)               | 2.03 ± 0.02 <sup>A</sup>    | 1.68 ± 0.25 <sup>A*</sup>    | 1.72 ± 0.21 <sup>A*</sup>    | 2.14 ± 0.04 <sup>b</sup>   | 3.75 ± 0.18 <sup>a</sup>   | 2.40 ± 0.33 <sup>b</sup>     |
| - IDF (g)               | 5.13 ± 0.11 <sup>AB</sup>   | 4.68 ± 0.34 <sup>B</sup>     | 5.50 ± 0.20 <sup>A*</sup>    | 5.38 ± 0.30 <sup>b</sup>   | 4.74 ± 0.06 <sup>b</sup>   | 6.47 ± 0.18 <sup>a</sup>     |
| <b>Total sugar (g)</b>  | 1.39 ± 0.01 <sup>C*</sup>   | 1.56 ± 0.05 <sup>B*</sup>    | 2.12 ± 0.03 <sup>A*</sup>    | 2.26 ± 0.03 <sup>c</sup>   | 2.70 ± 0.02 <sup>b</sup>   | 3.48 ± 0.08 <sup>a</sup>     |
| - Fructose(g)           | 0.25 ± 0.01 <sup>C*</sup>   | 0.60 ± 0.06 <sup>A*</sup>    | 0.44 ± 0.01 <sup>B*</sup>    | 0.88 ± 0.05 <sup>a</sup>   | 0.95 ± 0.00 <sup>a</sup>   | 0.96 ± 0.01 <sup>a</sup>     |
| - Glucose(g)            | 1.14 ± 0.01 <sup>B*</sup>   | 0.96 ± 0.11 <sup>B*</sup>    | 1.42 ± 0.00 <sup>A*</sup>    | 1.39 ± 0.02 <sup>c</sup>   | 1.59 ± 0.03 <sup>b</sup>   | 1.93 ± 0.08 <sup>a</sup>     |
| - Sucrose(g)            | <LOD                        | ND                           | 0.27 ± 0.02 <sup>*</sup>     | ND                         | 0.16 ± 0.01 <sup>b</sup>   | 0.59 ± 0.01 <sup>a</sup>     |
| <b>Ash (g)</b>          | 1.09 ± 0.02 <sup>A*</sup>   | 1.26 ± 0.11 <sup>A*</sup>    | 1.06 ± 0.04 <sup>A*</sup>    | 1.36 ± 0.01 <sup>c</sup>   | 1.70 ± 0.01 <sup>a</sup>   | 1.45 ± 0.01 <sup>b</sup>     |
| <b>Vitamin C (mg)</b>   | 93.37 ± 3.02 <sup>B*</sup>  | 190.69 ± 10.20 <sup>A*</sup> | 114.12 ± 16.47 <sup>B*</sup> | 177.42 ± 2.43 <sup>c</sup> | 237.08 ± 9.77 <sup>b</sup> | 286.90 ± 0.01 <sup>a</sup>   |
| <b>Minerals (mg)</b>    |                             |                              |                              |                            |                            |                              |
| - Calcium               | 64.79 ± 1.74 <sup>B*</sup>  | 98.14 ± 11.88 <sup>A*</sup>  | 75.31 ± 3.95 <sup>AB*</sup>  | 185.11 ± 3.14 <sup>c</sup> | 307.11 ± 3.30 <sup>a</sup> | 222.70 ± 0.84 <sup>b</sup>   |
| - Phosphorus            | 86.51 ± 1.14 <sup>A</sup>   | 82.86 ± 9.97 <sup>A</sup>    | 82.55 ± 1.46 <sup>A</sup>    | 90.37 ± 0.93 <sup>a</sup>  | 82.76 ± 5.32 <sup>a</sup>  | 80.49 ± 3.04 <sup>a</sup>    |
| - Sodium                | 19.60 ± 2.63 <sup>A**</sup> | 23.41 ± 8.66 <sup>A</sup>    | 12.44 ± 2.06 <sup>A*</sup>   | 10.00 ± 3.28 <sup>c</sup>  | 26.07 ± 0.76 <sup>a</sup>  | 19.82 ± 0.23 <sup>b</sup>    |
| - Potassium             | 283.49 ± 22.63 <sup>B</sup> | 340.90 ± 11.00 <sup>A</sup>  | 347.84 ± 11.41 <sup>A</sup>  | 286.28 ± 8.98 <sup>b</sup> | 337.63 ± 8.66 <sup>a</sup> | 302.99 ± 23.19 <sup>ab</sup> |
| - Magnesium             | 39.56 ± 1.95 <sup>B*</sup>  | 38.40 ± 2.04 <sup>B*</sup>   | 53.92 ± 2.60 <sup>A*</sup>   | 81.76 ± 0.90 <sup>b</sup>  | 70.20 ± 0.30 <sup>c</sup>  | 114.80 ± 0.10 <sup>a</sup>   |
| - Iron                  | 0.70 ± 0.01 <sup>B*</sup>   | 1.10 ± 0.13 <sup>A*</sup>    | 0.80 ± 0.01 <sup>B*</sup>    | 1.31 ± 0.02 <sup>ab</sup>  | 1.44 ± 0.13 <sup>a</sup>   | 1.09 ± 0.03 <sup>b</sup>     |
| - Zinc                  | 0.51 ± 0.01 <sup>C</sup>    | 0.57 ± 0.00 <sup>A*</sup>    | 0.54 ± 0.00 <sup>B</sup>     | 0.56 ± 0.03 <sup>a</sup>   | 0.68 ± 0.07 <sup>a</sup>   | 0.60 ± 0.04 <sup>a</sup>     |

All data were expressed as mean ± standard deviation (SD) of triplicate experiments ( $n = 3$ ). ND: not detected; TDF: total dietary fiber; SDF: soluble dietary fiber; IDF: insoluble dietary fiber; capital and small letters indicate significant differences ( $p < 0.05$ ) of the same nutrients in young shoots and old leaves, respectively, from different harvesting periods using one-way analysis of variance (ANOVA) and Duncan's multiple comparison test; \* indicates significant differences ( $p < 0.05$ ) of the same nutrient between young shoot and old leaves from the same harvesting period using unpaired t-test.



## Supplementary Table S8:

Nutritional compositions (per 100 g fresh weight) in young shoots and old leaves of *Adenia viridiflora* Craib. collected from Uthai Thani (UT) origin in different harvesting periods.

| Nutrients               | Young shoots                |                             |                              | Old leaves                  |                             |                            |
|-------------------------|-----------------------------|-----------------------------|------------------------------|-----------------------------|-----------------------------|----------------------------|
|                         | March-April                 | May-June                    | July-August                  | March-April                 | May-June                    | July-August                |
| <b>Energy (kcal)</b>    | 54.98 ± 0.50 <sup>A*</sup>  | 50.68 ± 4.44 <sup>A*</sup>  | 52.57 ± 1.87 <sup>A*</sup>   | 75.98 ± 2.21 <sup>a</sup>   | 69.86 ± 1.63 <sup>b</sup>   | 65.45 ± 1.38 <sup>b</sup>  |
| <b>Moisture (g)</b>     | 85.20 ± 0.14 <sup>A*</sup>  | 86.45 ± 1.24 <sup>A*</sup>  | 86.27 ± 0.52 <sup>A*</sup>   | 80.14 ± 0.49 <sup>b</sup>   | 81.45 ± 0.66 <sup>ab</sup>  | 82.77 ± 0.36 <sup>a</sup>  |
| <b>Protein (g)</b>      | 2.91 ± 0.03 <sup>A*</sup>   | 2.59 ± 0.01 <sup>C*</sup>   | 2.85 ± 0.01 <sup>B*</sup>    | 3.77 ± 0.01 <sup>a</sup>    | 3.07 ± 0.01 <sup>c</sup>    | 3.31 ± 0.03 <sup>b</sup>   |
| <b>Fat (g)</b>          | 0.10 ± 0.01 <sup>C*</sup>   | 0.28 ± 0.03 <sup>B</sup>    | 0.43 ± 0.03 <sup>A</sup>     | 0.54 ± 0.06 <sup>a</sup>    | 0.34 ± 0.18 <sup>a</sup>    | 0.39 ± 0.01 <sup>a</sup>   |
| <b>Carbohydrate (g)</b> | 10.62 ± 0.11 <sup>A*</sup>  | 9.46 ± 1.17 <sup>A*</sup>   | 9.33 ± 0.52 <sup>A*</sup>    | 14.02 ± 0.40 <sup>a</sup>   | 13.65 ± 0.81 <sup>ab</sup>  | 12.19 ± 0.39 <sup>b</sup>  |
| <b>TDF (g)</b>          | 8.95 ± 0.35 <sup>A*</sup>   | 8.81 ± 0.03 <sup>A</sup>    | 7.16 ± 0.16 <sup>B*</sup>    | 5.64 ± 0.11 <sup>c</sup>    | 8.61 ± 0.16 <sup>a</sup>    | 8.01 ± 0.07 <sup>b</sup>   |
| - SDF (g)               | 2.25 ± 0.33 <sup>AB*</sup>  | 2.76 ± 0.07 <sup>A*</sup>   | 1.63 ± 0.28 <sup>B*</sup>    | 0.98 ± 0.05 <sup>c</sup>    | 3.32 ± 0.21 <sup>a</sup>    | 2.12 ± 0.12 <sup>b</sup>   |
| - IDF (g)               | 6.70 ± 0.03 <sup>A*</sup>   | 6.05 ± 0.10 <sup>AB*</sup>  | 5.53 ± 0.44 <sup>B*</sup>    | 4.66 ± 0.06 <sup>c</sup>    | 5.29 ± 0.05 <sup>b</sup>    | 5.90 ± 0.19 <sup>a</sup>   |
| <b>Total sugar (g)</b>  | 1.60 ± 0.01 <sup>B*</sup>   | 1.98 ± 0.21 <sup>AB*</sup>  | 2.22 ± 0.10 <sup>A*</sup>    | 2.70 ± 0.02 <sup>ab</sup>   | 2.51 ± 0.13 <sup>a</sup>    | 2.86 ± 0.07 <sup>a</sup>   |
| - Fructose(g)           | 0.13 ± 0.01 <sup>C*</sup>   | 0.63 ± 0.04 <sup>A*</sup>   | 0.45 ± 0.01 <sup>B*</sup>    | 0.90 ± 0.05 <sup>a</sup>    | 0.96 ± 0.04 <sup>a</sup>    | 0.92 ± 0.03 <sup>a</sup>   |
| - Glucose(g)            | 1.47 ± 0.00 <sup>A*</sup>   | 1.36 ± 0.18 <sup>A</sup>    | 1.50 ± 0.08 <sup>A</sup>     | 1.80 ± 0.03 <sup>a</sup>    | 1.55 ± 0.17 <sup>a</sup>    | 1.64 ± 0.03 <sup>a</sup>   |
| - Sucrose(g)            | <LOD                        | ND                          | 0.28 ± 0.01 <sup>*</sup>     | <LOD                        | ND                          | 0.30 ± 0.01 <sup>a</sup>   |
| <b>Ash (g)</b>          | 1.18 ± 0.01 <sup>A*</sup>   | 1.24 ± 0.09 <sup>A*</sup>   | 1.13 ± 0.01 <sup>A*</sup>    | 1.54 ± 0.01 <sup>a</sup>    | 1.51 ± 0.04 <sup>a</sup>    | 1.36 ± 0.01 <sup>b</sup>   |
| <b>Vitamin C (mg)</b>   | 130.14 ± 1.02 <sup>B*</sup> | 136.06 ± 1.68 <sup>B*</sup> | 233.08 ± 12.30 <sup>A*</sup> | 234.77 ± 7.46 <sup>c</sup>  | 266.74 ± 1.60 <sup>b</sup>  | 386.08 ± 1.62 <sup>a</sup> |
| <b>Minerals (mg)</b>    |                             |                             |                              |                             |                             |                            |
| - Calcium               | 62.00 ± 2.23 <sup>C*</sup>  | 106.05 ± 3.68 <sup>A*</sup> | 85.29 ± 3.90 <sup>B*</sup>   | 194.11 ± 0.46 <sup>b</sup>  | 254.37 ± 2.16 <sup>a</sup>  | 172.39 ± 4.59 <sup>c</sup> |
| - Phosphorus            | 79.48 ± 11.38 <sup>A</sup>  | 74.86 ± 2.37 <sup>A</sup>   | 76.61 ± 4.79 <sup>A</sup>    | 94.82 ± 0.79 <sup>a</sup>   | 80.17 ± 4.72 <sup>b</sup>   | 79.13 ± 2.59 <sup>b</sup>  |
| - Sodium                | 14.25 ± 8.11 <sup>A</sup>   | 12.91 ± 7.57 <sup>A</sup>   | 9.53 ± 0.00 <sup>A</sup>     | 6.11 ± 1.41 <sup>a</sup>    | 12.27 ± 8.08 <sup>a</sup>   | 7.62 ± 1.69 <sup>a</sup>   |
| - Potassium             | 322.28 ± 19.76 <sup>A</sup> | 333.17 ± 20.59 <sup>A</sup> | 349.97 ± 3.27 <sup>A</sup>   | 367.58 ± 28.34 <sup>a</sup> | 323.08 ± 17.78 <sup>a</sup> | 369.56 ± 9.86 <sup>a</sup> |
| - Magnesium             | 36.31 ± 2.80 <sup>B*</sup>  | 31.87 ± 1.20 <sup>B*</sup>  | 58.87 ± 3.65 <sup>A*</sup>   | 78.45 ± 0.70 <sup>b</sup>   | 56.68 ± 2.74 <sup>c</sup>   | 137.62 ± 2.14 <sup>a</sup> |
| - Iron                  | 0.65 ± 0.07 <sup>A*</sup>   | 0.69 ± 0.01 <sup>A*</sup>   | 0.76 ± 0.08 <sup>A*</sup>    | 1.26 ± 0.04 <sup>a</sup>    | 0.91 ± 0.08 <sup>b</sup>    | 1.01 ± 0.09 <sup>b</sup>   |
| - Zinc                  | 0.47 ± 0.10 <sup>A</sup>    | 0.52 ± 0.01 <sup>A*</sup>   | 0.48 ± 0.00 <sup>A</sup>     | 0.52 ± 0.01 <sup>a</sup>    | 0.57 ± 0.01 <sup>a</sup>    | 0.52 ± 0.04 <sup>a</sup>   |

All data were expressed as mean ± standard deviation (SD) of triplicate experiments ( $n = 3$ ). ND: not detected; TDF: total dietary fiber; SDF: soluble dietary fiber; IDF: insoluble dietary fiber; capital and small letters indicate significant differences ( $p < 0.05$ ) of the same nutrients in young shoots and old leaves, respectively, from different harvesting periods using one-way analysis of variance (ANOVA) and Duncan's multiple comparison test; \* indicates significant differences ( $p < 0.05$ ) of the same nutrient between young shoot and old leaves from the same harvesting period using unpaired t-test.
